# Supplementary material
Source: Springer Nature journal article supplement (https://www.springermedizin.de/resource/supplementary/12985_2012_2095_MOESM1_ESM.pdf/9606022)
Supplement: MOESM1 [file 9606022]

**Table S1.** The description of each restriction enzyme used in the study.

| <b>Enzyme</b> | <b>Sequence</b>                             | <b>Methylation effects</b>               |
|---------------|---------------------------------------------|------------------------------------------|
| EcoRV         | 5'... $\square$ GAT $\downarrow$ ATC...3'   | No methylation effects on digestion      |
| EcoRI         | 5'...G $\downarrow$ AATTC...3'              | No methylation effects on digestion      |
| HindIII       | 5'... $\square$ A $\downarrow$ AGCTT... 3'  | No methylation effects on digestion      |
| NsiI          | 5'... $\square$ ATGCA $\downarrow$ T...3'   | No methylation effects on digestion      |
| NcoI          | 5'...C $\downarrow$ CATGG...3'              | No methylation effects on digestion      |
| PaeI          | 5'... $\square$ GCATG $\downarrow$ C...3'   | No methylation effects on digestion      |
| DpnI          | 5'...G <sup>m</sup> 6A $\downarrow$ TC...3' | Does not cut <i>dam</i> <sup>-</sup> DNA |
| EcoRII        | 5'... $\square$ $\downarrow$ CCWGG...3'     | Dcm: completely overlaps – blocked       |
| SnaBI         | 5'...TAC $\downarrow$ GTA...3'              | CpG: completely overlaps – blocked       |
